# Supplementary material for: Exploring the potential of curcumin for control of N-acyl homoserine lactone-mediated biofouling in membrane bioreactors for wastewater treatment
Source: Royal Society of Chemistry journal article supplement (doi:10.1039/c6ra28032c), 2017-01-01
Supplement: c6ra28032c1.pdf [file c6ra28032c1.pdf]

**Supporting Information:**

**Exploring the potential of curcumin for control of *N*-acyl homoserine lactone-mediated biofouling in membrane bioreactor for wastewater treatment**

Harshad Lade,<sup>a</sup> Won Jung Song,<sup>a</sup> Young Jae Yu,<sup>a</sup> Jun Hee Ryu,<sup>a</sup> G. Arthanareeswaran<sup>b</sup> and Ji Hyang Kweon<sup>\*a</sup>

<sup>a</sup>*Water Treatment and Membrane Laboratory, Department of Environmental Engineering, Konkuk University, Seoul 05029, Republic of Korea. E-mail: [jhkweon@konkuk.ac.kr](mailto:jhkweon@konkuk.ac.kr); Fax: +82-2-450-3542; Tel: +82-2-450-4053*

<sup>b</sup>*Membrane Research Laboratory, Department of Chemical Engineering, National Institute of Technology, Tiruchirappalli 620015, India.*

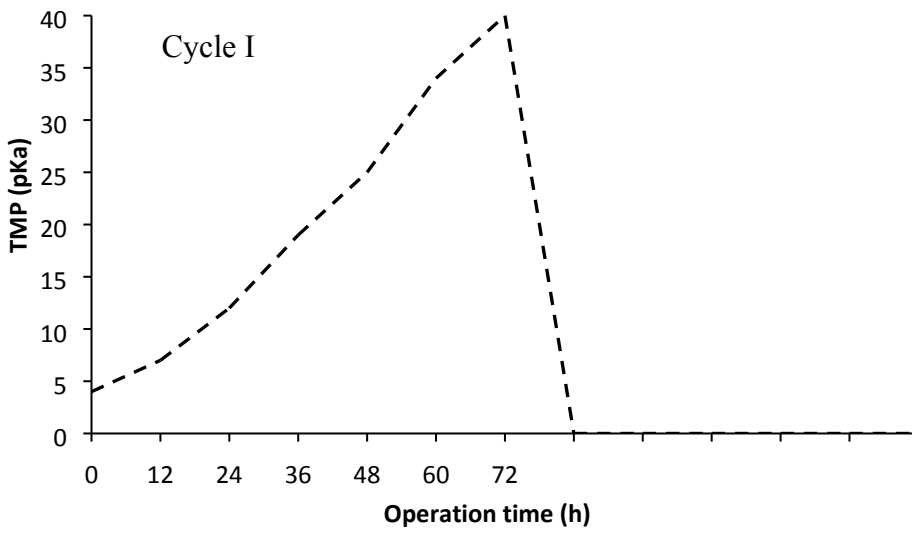

**Fig. S1.** TMP profiles of control MBR under continuous operation.

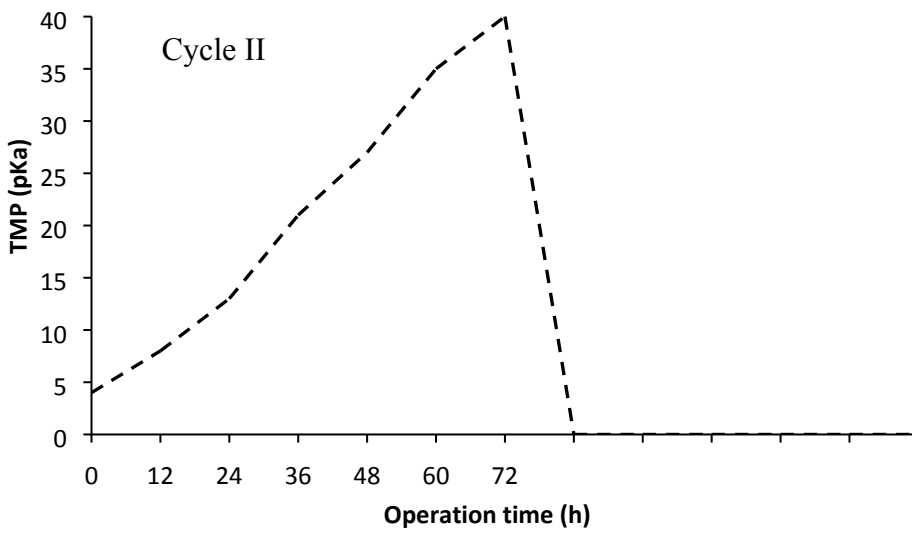

**Fig. S2.** TMP profiles of control MBR under continuous operation.

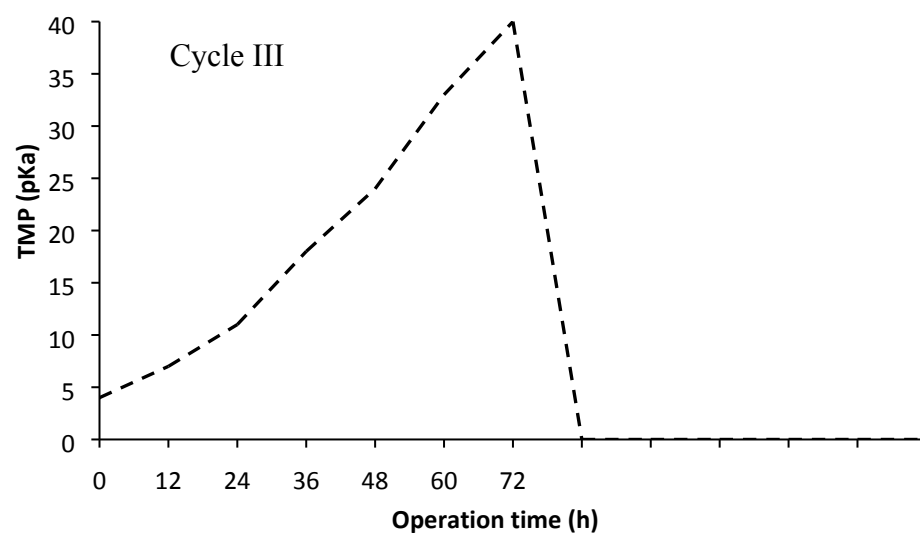

**Fig. S3.** TMP profiles of control MBR under continuous operation.
